# Supplementary material
Source: ML conference proceedings conference paper supplement (https://openreview.net/forum?id=Jom8tNYuQI)

## Lie Group diffusion

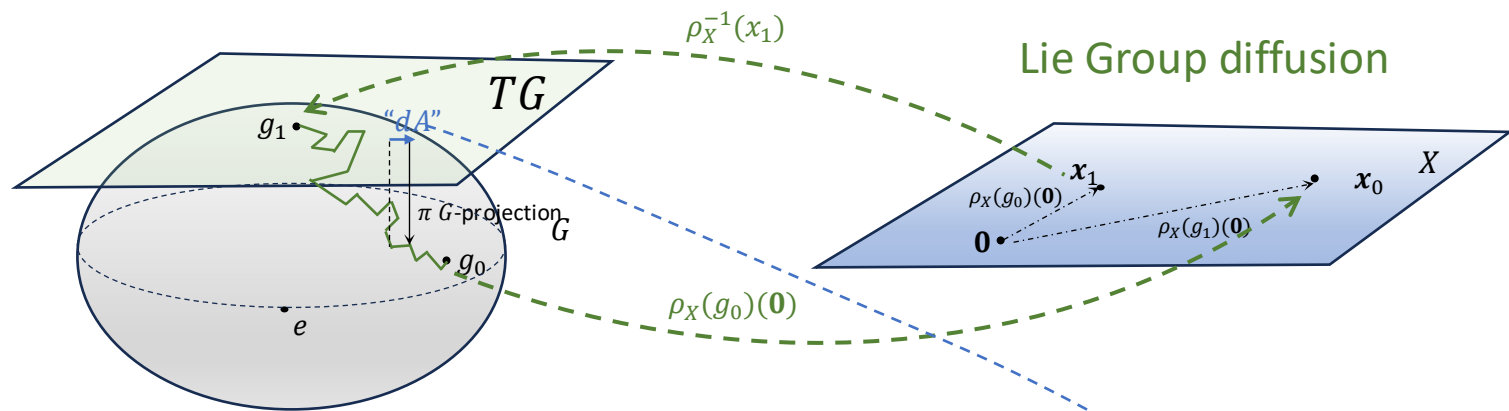

## Lie Group representation diffusion

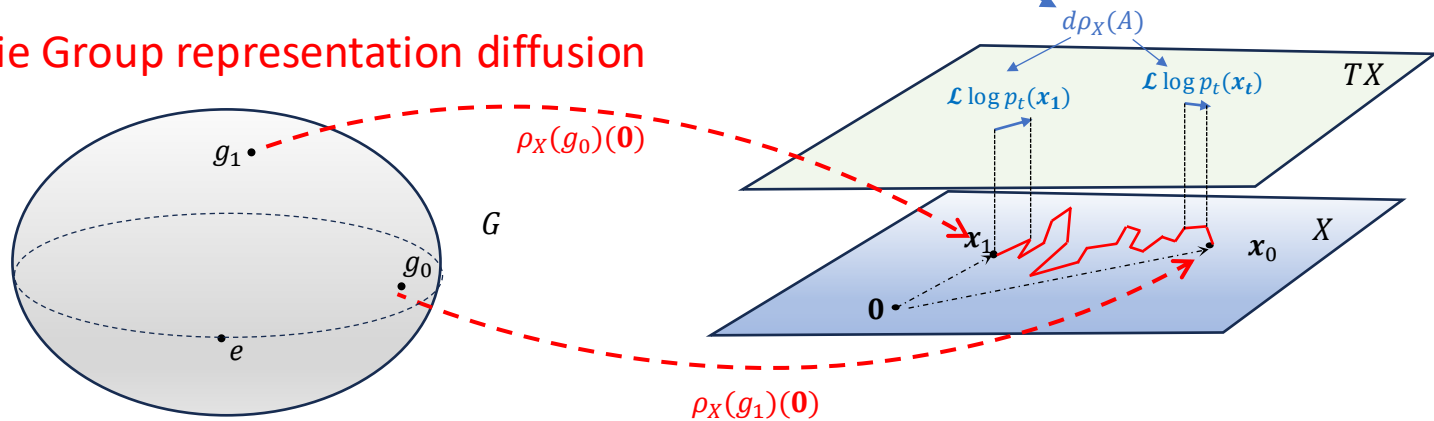

Supplement: supplementary_material [file lie_group_diff_comparison.pdf › Diffusion_Generative_Modeling_on_Lie_Group_Representations_CodeSupplementary/assets/lie_group_diff_comparison.pdf]
